# Supplementary material
Source: Springer Nature journal article supplement (https://www.springermedizin.de/resource/supplementary/13075_2009_2761_MOESM7_ESM.pdf/9692826)

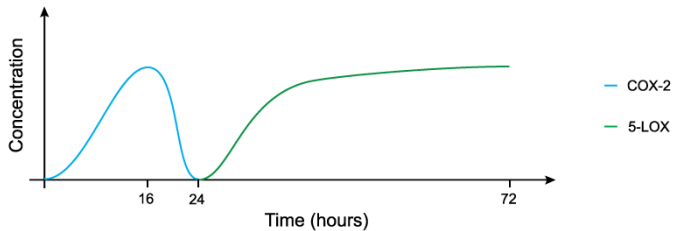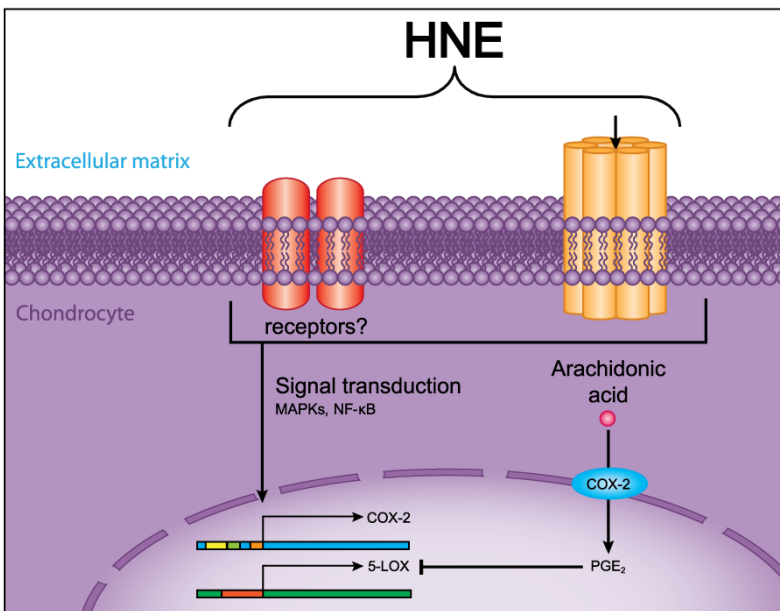

Supplement: MOESM7 [file 9692826]
